# Supplementary material for: Mass transfer characteristics and energy penalty analysis of MEA regeneration process in packed column
Source: Royal Society of Chemistry journal article supplement (doi:10.1039/d0se01251c), 2020-11-16
Supplement: d0se01251c1.pdf [file d0se01251c1.pdf]

## Supplementary Information for Sustainable Energy & Fuels

### Mass Transfer Characteristics and Energy Penalty Analysis of MEA Regeneration Process in Packed Column

Fengming Chu, Guozhen Xiao, Guoan Yang\*

*College of Mechanical and Electrical Engineering, Beijing University of Chemical  
Technology, Beijing 100029, China*

\* Corresponding author: Guoan Yang

Email: [ygapublic@163.com](mailto:ygapublic@163.com)

#### 1. Correlative terms

##### 1.1. Mass transfer model source term

$S_{\text{CO}_2\_G}$ (kg/m<sup>3</sup>/s) is the mass desorbed from the liquid phase per unit volume and time. The regeneration reaction of MEA is a second-order reaction, and  $S_{\text{CO}_2\_G}$ (kg/m<sup>3</sup>/s) can be expressed as follows<sup>1,2</sup>:

$$S_{\text{CO}_2\_G} = M_{\text{CO}_2} \cdot k_r \cdot X_{\text{MEACOO}^-} \cdot X_{\text{MEA}^{\text{H}^+}} \quad (1)$$

where  $M_{\text{CO}_2}$  (kg/kmol) is  $\text{CO}_2$  molecular weight;  $X_{\text{MEACOO}^-}$ (kmol/m<sup>3</sup>) and  $X_{\text{MEA}^{\text{H}^+}}$ (kmol/m<sup>3</sup>) are the molar concentration of  $\text{MEACOO}^-$  and  $\text{MEA}^{\text{H}^+}$  in the rich solution, respectively.  $k_r$ (kmol/m<sup>3</sup>/s) represents the reaction rate constant of the MEA regeneration reaction, which can be obtained by the Arrhenius equation<sup>1</sup>:

$$k_r = \frac{4.3 \times 10^{11}}{60} e^{\frac{E}{RT}} \quad (2)$$

where  $E$  (J/mol) is the activation energy of  $-8.079 \times 10^4$  J/mol.  $R$ (J/mol/K) represents the ideal gas constant.

$S_{\text{H}_2\text{O}_G}$ (kg/m<sup>3</sup>/s) is the mass of  $\text{H}_2\text{O}$  evaporating from liquid to gas phase per unit volume and time, which can be expressed as follows: <sup>3,4</sup>

$$S_{\text{H}_2\text{O}_G} = k_{g,\text{H}_2\text{O}} a_w (p_{\text{H}_2\text{O}} - p_{\text{H}_2\text{O},G}) M_{\text{H}_2\text{O}} \quad (3)$$

where  $p_{\text{H}_2\text{O},G}$ (kPa) is the partial pressures of  $\text{H}_2\text{O}$  in the main gas phase.  $k_{g,\text{H}_2\text{O}}$ (kmol/kPa/m<sup>2</sup>/s) is the gas phase mass transfer coefficient of  $\text{H}_2\text{O}$ , which can be obtained as follows:<sup>3-5</sup>

$$k_{g,\text{H}_2\text{O}} = \frac{5.23 * \left(\frac{G_M}{a_T \mu_g}\right)^{0.7} \left(\frac{\mu_g}{\rho_g D_{g\text{H}_2\text{O}}}\right)^{\frac{1}{3}} (a_T d_p)^{-2} \left(\frac{D_{L,w} a_T}{R_g T}\right)}{3600 * 101.325} \quad (4)$$

where  $G_M$  (kg/m<sup>2</sup>/h) and  $\mu_g$ (Pa·s) are the gas phase mass velocity and viscosity, respectively.

$p_{\text{H}_2\text{O}}$  (kPa) is the saturated vapor pressure of the water, which can be expressed as Antoine equation:

$$p_{\text{H}_2\text{O}} = 10^{(7.07406 - 1657.46 / (746.13))} \quad (5)$$

As the losing mass of  $\text{H}_2\text{O}$  is equal to the adding mass of  $\text{H}_2\text{O}$  in the gas phase, the source term of  $S_{\text{H}_2\text{O}}$ (kg/m<sup>3</sup>/s) can be expressed as follows:

$$S_{\text{H}_2\text{O}} = -S_{\text{H}_2\text{O}_G} \quad (6)$$

$S_{\text{MEA}^-}$ (kg/m<sup>3</sup>/s) and  $S_{\text{MEA}}$ (kg/m<sup>3</sup>/s) represent the  $\text{MEACOO}^-$  consuming mass and MEA generation mass in the liquid phase as the reaction happening. Therefore,  $S_{\text{MEA}^-}$  and  $S_{\text{MEA}}$ (kg/m<sup>3</sup>/s) can be expressed as follows:

$$S_{\text{MEA}^-} = -\frac{S_{\text{CO}_2-G}}{M_{\text{CO}_2}} M_{\text{MEACOO}^-} \quad (7)$$

$$S_{\text{MEA}} = 2 \frac{S_{\text{CO}_2-G}}{M_{\text{CO}_2}} M_{\text{MEA}} \quad (8)$$

where  $M_{\text{MEACOO}^-}$  (kg/kmol) and  $M_{\text{MEA}}$  (kg/kmol) are  $\text{MEACOO}^-$  and MEA molecular weights.

$S_m$  (kg/m<sup>3</sup>/s) is the source term of continuity equation, which is the losing mass of  $\text{CO}_2$  and  $\text{H}_2\text{O}$  per unit volume and time, which can be expressed as follows:

$$S_m = -S_{\text{CO}_2-G} - S_{\text{H}_2\text{O}_G} \quad (9)$$

The packing materials of Mellapak type are investigated in this paper, which get widely used in industrial engineering. The liquid phase volume fraction  $h$  can be expressed as follows:<sup>6</sup>

$$h = ca_T^{0.83} L_m^x (\mu_L / \mu_{L,0})^{0.25} / 100 \quad (10)$$

where  $a_T(1/m)$  is the surface area packings and  $L_m(m^3/m^2/h)$  is the volume flow rate of the rich solution.  $\mu_L$  and  $\mu_{L,0}$  (Pa·s) are the liquid phase viscosity and that at the temperature of 20°C. When  $L_m < 40$ ,  $c=0.0169$ ,  $x=0.37$ . On the other hand,  $c=0.075$ ,  $x=0.59$ .

The viscosity of rich solutions can be obtained from the empirical formula proposed by Weiland et al.<sup>7</sup>:

$$\frac{\mu_L}{\mu_{H_2O}} = \exp\left(\frac{C_{MEA}(21.186C_{MEA} + 2373)\left[r_C(0.01015C_{MEA} + 0.0093T - 2.2589) + 1\right]}{T^2}\right) \quad (11)$$

where  $r_C$  (molCO<sub>2</sub>/molMEA) is the CO<sub>2</sub> loading in the rich solution.  $\mu_{H_2O}$  (Pa·s) is the pure water viscosity.

The viscosity of pure water can be determined by the following correlation<sup>8</sup>:

$$\mu_{H_2O} = 1.18 \times 10^{-6} \exp\left(\frac{16400}{RT}\right) \quad (12)$$

The MEA molecular diffusivity in the rich solutions can be calculated according to the empirical formula by Snijder et al.<sup>9</sup>:

$$D_{L,MEA} = \exp\left(-13.275 - \frac{2198.3}{T} - 0.078142X_{MEA}\right) \quad (13)$$

As reported by Versteeg and Vanswaaij, the molecular diffusivities of MEAH<sup>+</sup> and MEACOO<sup>-</sup> equal that of MEA<sup>10</sup>.

## 1.2. Momentum equation source term

The interface drag force  $F_{LG}$  (N/m<sup>3</sup>) by the gas phase can be expressed as follows

11:

$$\mathbf{F}_{LG} = \frac{\Delta p_L}{|\mathbf{U}_{slip}|} \mathbf{U}_{slip} \quad (14)$$

where  $\Delta p_L$ (N/m<sup>3</sup>) is the pressure drop of the packing column.  $\mathbf{U}_{slip}$  (m/s) represents the slip velocity between the gas and liquid phases, with the following formula calculated:

$$\mathbf{U}_{slip} = \mathbf{U}_G - \mathbf{U} \quad (15)$$

where  $\mathbf{U}_G$ (m/s) is the velocity vector of gas phase, and  $\mathbf{U}$  (m/s) represents the liquid phase velocity vector.

The pressure drop of packing column  $\Delta p_L$ (N/m<sup>3</sup>) can be obtained by the formula proposed by Robbins<sup>12</sup>.

$$\Delta p_L = 0.774 \left( \frac{L_f}{20000} \right)^{0.1} \left( p_1 G_f^2 \times 10^{p_2 L_f} \right)^4 \quad (16)$$

where  $p_1=0.04002$ ,  $p_2=0.0199$ ,  $L_f$  (kg/m<sup>2</sup>/s) and  $G_f$  (kg/m<sup>2</sup>/s) are the liquid and gas loading factors, which can be obtained as follows:

$$G_f = G (1.2 / \rho_G)^{0.5} (F_{pd} / 65.62)^{0.5} \quad (17)$$

$$L_f = L (1000 / \rho) (F_{pd} / 65.62)^{0.5} \mu^{0.2} \quad (18)$$

The resistance by the packing materials can be gained by the empirical formula from Ergun and Orning<sup>13</sup>.

$$F_{LS,x} = - \left( 150 \mu \frac{(1-\gamma)^2}{\gamma^2 d_e^2} + 1.75 \rho \frac{(1-\gamma)}{\gamma d_e} |\mathbf{U}| \right) \mathbf{U} \quad (19)$$

$$F_{LS,r} = - \left( 150 \mu \frac{(1-\gamma)^2}{\gamma^2 d_e^2} + 1.75 \rho \frac{(1-\gamma)}{\gamma d_e} |\mathbf{U}| \right) \mathbf{V} \quad (20)$$

where  $d_e$  (m) is the equivalent diameter of the packing, with the following form calculated:

$$d_e = \frac{6(1-\gamma)}{a_T} \quad (21)$$

### 1.3. Energy equation source term

$S_{T\_G}$ (J/m<sup>3</sup>/s) is the energy equation source term of gas phase, which contains the physical volatilization heat of CO<sub>2</sub> and H<sub>2</sub>O, the convective heat transfer. Therefore,  $S_{T\_G}$  can be expressed as follows<sup>14,15</sup>:

$$S_{T\_G} = h_{\text{exc}} a_w (T - T_G) + \frac{S_{\text{CO}_2-G}}{M_{\text{CO}_2}} \cdot H_1 + \frac{S_{\text{H}_2\text{O}-G}}{M_{\text{H}_2\text{O}}} \cdot H_2 \quad (22)$$

where  $h_{\text{exc}}$ (w/m<sup>2</sup>/K) is the coefficient of convective heat transfer, which can be expressed as the Chilton–Colburn analogy<sup>4</sup>.  $a_w$ (m<sup>2</sup>/m<sup>3</sup>) represents gas and liquid contact area.  $H_1$ (J/kmol) is CO<sub>2</sub> volatilization heat, which is  $1.975 \times 10^7$  J/kmol.  $H_2$ (J/kmol) is water volatilization heat, which is  $4.4 \times 10^7$  J/kmol.

$S_{T\_L}$ (J/m<sup>3</sup>/s) is the energy equation source term of the liquid, which contains the regeneration reaction absorbing heat and the convective heat with gas.

$$S_{T\_L} = -\frac{S_{\text{CO}_2-G}}{M_{\text{CO}_2}} \cdot H_R - S_{T\_G} \quad (23)$$

where  $H_R$  is the endothermic chemical reaction heat, which is  $8.4443 \times 10^7$  J/kmol.

## 2. Boundary conditions

It is of significance for solving all the conservation equations to determine the real boundary conditions in the stripper, which is shown in Fig. 1. The detail settings of the boundary conditions for all of the conservation equations are presented in this part.

### (1) The top of stripper.

Both the rich solution inlet and the gas phase outlet are at the top of the stripper. The boundary condition of the top is set as the velocity inlet in the Fluent 6.3.26. The boundary conditions of the top for each conservation equation are presented as follows:

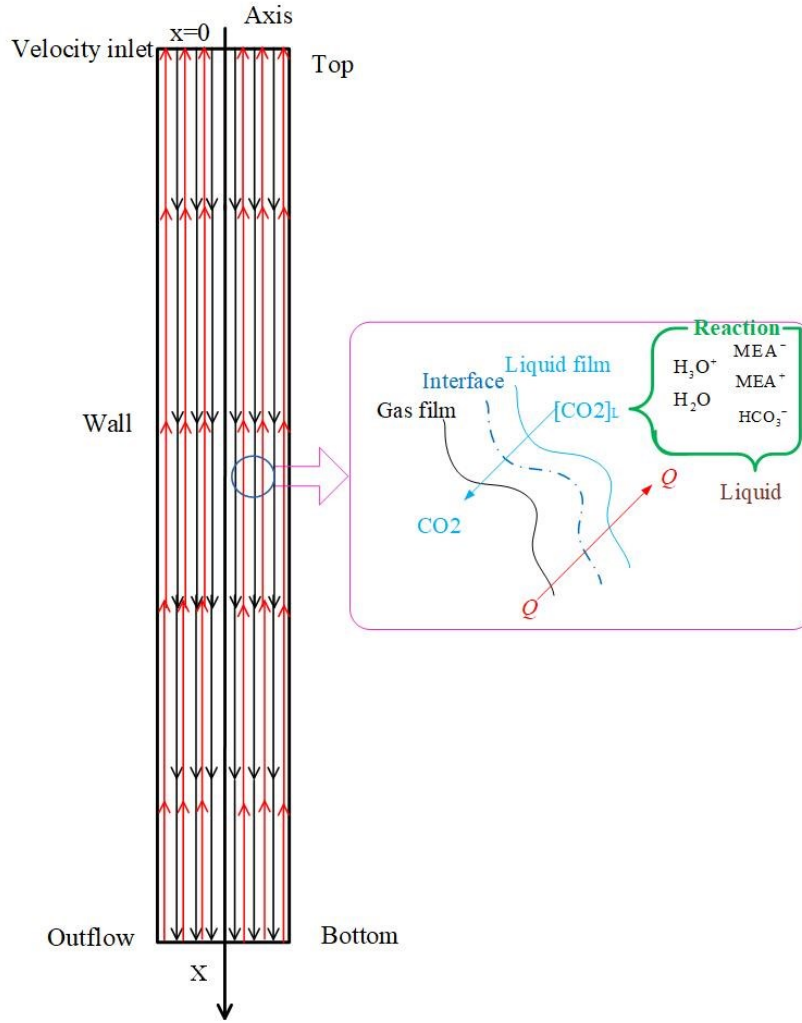

Fig. 1. Schematics of the regeneration process in the stripper and corresponding boundary conditions.

The continuity equation:

$$U = U_{\text{inlet}} \quad (24)$$

$$V_{\text{inlet}} = 0 \quad (25)$$

The turbulent model:

$$k_{\text{inlet}} = 0.003 \cdot (U_{\text{inlet}})^2 \quad (26)$$

$$\varepsilon_{\text{inlet}} = \frac{0.09 \cdot (k_{\text{inlet}})^{1.5}}{d_{\text{H}}} \quad (27)$$

where  $d_{\text{H}}$  represents the hydraulic diameter, which can be obtained as follow:

$$d_H = \frac{\gamma}{\alpha_T(1-\gamma)} \quad (28)$$

The energy conservation equation:

$$T = T_{\text{inlet}} \quad (29)$$

$$\overline{t_{\text{inlet}}^2} = (0.082\Delta T)^2 \quad (30)$$

$$\varepsilon_{t,\text{inlet}} = 0.4 \cdot \left( \frac{\varepsilon_{\text{inlet}}}{k_{\text{inlet}}} \right) \overline{t_{\text{inlet}}^2} \quad (31)$$

For the convenience,  $\Delta T$  is set as 0.1K.

The mass fraction of  $i$  species (MEACOO<sup>-</sup>, MEA and H<sub>2</sub>O) conservation equation:

$$C_i = C_{i,\text{inlet}} \quad (32)$$

$$\overline{c_{\text{inlet}}^2} = (0.082C_{i,\text{inlet}})^2 \quad (33)$$

$$\varepsilon_{c,\text{inlet}} = 0.4 \cdot \left( \frac{\varepsilon_{\text{inlet}}}{k_{\text{inlet}}} \right) \overline{c_{\text{inlet}}^2} \quad (34)$$

(2) The bottom of stripper:

The stripper bottom is designed for the outlet of the lean solution and the inlet of the gas phase. Because the fully developed condition of the rich solution can be achieved at the bottom of stripper, the outflow boundary condition in the Fluent 6.3.26 is set. The inlet temperature of gas phase is also set at this place. The boundary conditions of the bottom for each conservation equation are presented as follows:

The bottom is the outlet for the liquid phase. Owing to the outflow condition, a zero diffusion flux is achieved for all flow variables ( $\Phi$ ), which is presented as follows:

$$\frac{\partial \Phi}{\partial n} = 0 \quad (27)$$

The continuity equation: the inlet velocity of gas phase is input by the UDF (user define function).

The energy conservation equation:

$$T_G = T_{G,\text{inlet}} \quad (28)$$

The mass fraction of  $k$  species (CO<sub>2</sub> and H<sub>2</sub>O) conservation equation:

$$C_k = C_{k,\text{inlet}} \quad (29)$$

(3) The wall of stripper:

The no-slip condition with the standard wall functions in the Fluent 6.3.26 is selected at the wall, owing to the advantage of the no-slip condition. Because the adiabatic column is assumed, the no heat transferred through the wall.

(4) The axis of stripper:

The hydraulic, heat and mass transfer characteristics are assumed to axis-symmetrical, so the axis condition is selected. Owing to the axis condition, the zero normal gradients of all variables ( $\Phi$ ) is achieved at the axis, which is presented as follows:

$$\frac{\partial \Phi}{\partial r} = 0 \quad (30)$$

### 3. Model verification

This model is verified by the regeneration experiments carried out by Tobiesen et al.<sup>16</sup>, who reported nineteen groups of liquid phase temperature profiles in the packed columns. The stripper is equipped with Sulzer Mellapak 250Y packings. And the main information is presented in Table 1. Two runs of the experimental results are compared with the simulated data, which are shown in Fig.2. Fig.2 illustrates that the numerical data presents a good agreement with the experimental data. There are some small differences in Fig.2, which can be accepted. Therefore, the model in this paper is reliable enough to simulate MEA regeneration process in the packed columns.

#### **Table 1**

Detailed information of the experiment.



|                                                        | Run 2 | Run 18 |
|--------------------------------------------------------|-------|--------|
| Stripper hight(m)                                      | 3.89  | 3.89   |
| Stripper diameter(m)                                   | 0.1   | 0.1    |
| Gas flow rate (m <sup>3</sup> /h)                      | 150   | 150    |
| Liquid flow rate (m <sup>3</sup> /(m <sup>2</sup> ·h)) | 7.64  | 17.20  |
| MEA concentration (kmol/m <sup>3</sup> )               | 5.0   | 5.2    |
| CO <sub>2</sub> loading (mol/mol)                      | 0.315 | 0.407  |
| Liquid inlet temperature (°C)                          | 115   | 113    |

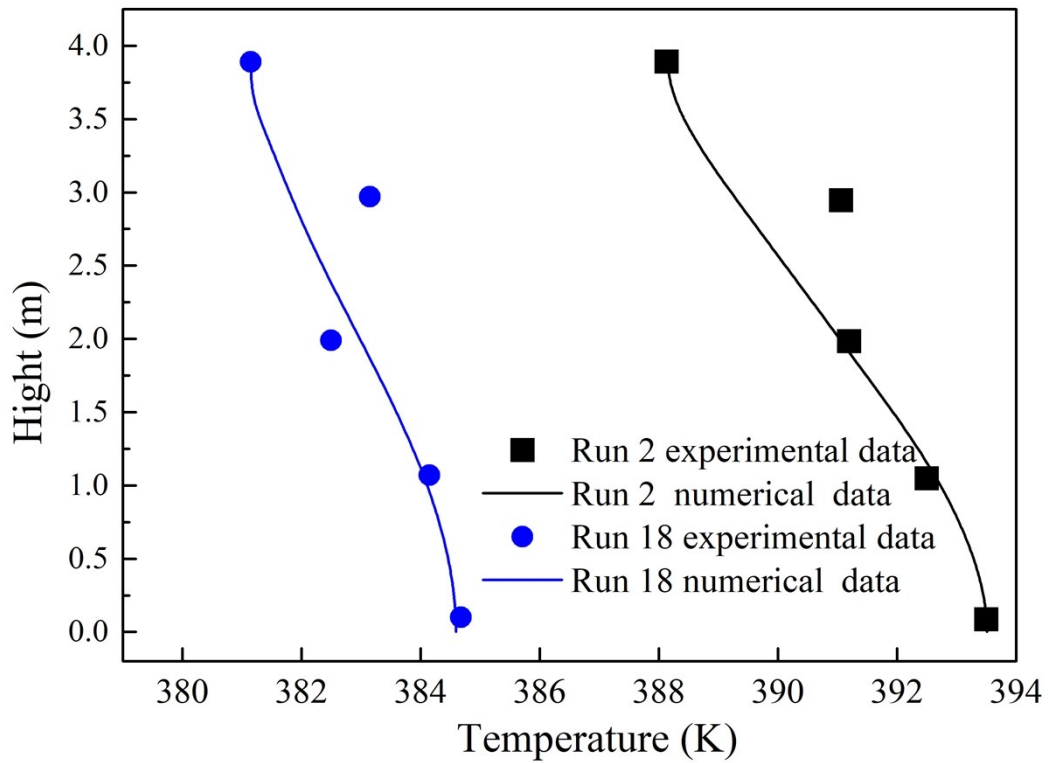

Fig. 3. Comparisons between numerical and experimental results.

## Reference

1. P. Niegodajew, D. Asendrych and S. Drobnik, *J. Power. Techn.*, 2013, **93**, 354–362.
2. Z.-Y. Sun, M.-H. Fan and M. Argyle, *Energ. Fuel.*, 2011, **25**, 2988–2996.
3. H.-M. Park, *Int. J. Heat. Mass. Tran.*, 2014, **75**, 545-564.
4. M. Saimpert, G. Puxty, S. Qureshi, L. Wardhaugh and A. Cousins, *Chem. Eng. Sci.*, 2013, **96**, 10-25.
5. K. Onda, H. Takeuchi and Y. Okumoto, *J. Chem. Eng. Jpn.*, 1968, **1**, 56-62.
6. W. Li, X. Zhao, B. Liu and Z. Tang, *Ind. Eng. Chem. Res.* 2014, **53(14)**, 6185-6196.
7. R.-H. Weiland, J.-C. Dingman, D.-B. Cronin and G.-J. Browning, *J. Chem. Eng. Data.*, 1998, **43**, 378–382.
8. Q. Zeng, Y. Guo, Z. Niu and W. Lin, *Ind. Eng. Chem. Res.*, 2011, **50**, 10168-10175.
9. E.-D. Snijder, M.-J.-M. Teriele, G.-F. Versteeg and W.-P.-M. Vanswaaij, *J. Chem. Eng. Data.*, 1993, **38**, 475–480.
10. G.-F. Versteeg and W.-P.-M. Vanswaaij, *Chem. Eng. Sci.*, 1988, **43**, 573-585.
11. F. Chu, C. Jon, L. Yang, X. Du and Y. Yang, *Ind. Eng. Chem. Res.*, 2016, **55**, 3696–3709.
12. L.-A. Robbins, *Chem. Eng. Prog.*, 1991, **87**, 87-89.
13. S. Ergun and A.-A. Orning, *Chem. Eng. Prog.*, 1952, **48**, 1179-1184.
14. J. Gáspár and A.-M. Cormoş, *Comput. Chem. Eng.*, 2011, **35(10)**, 2044-2052.
15. P. Niegodajew, D. Asendrych, *Int. J. Heat. Mass. Tran.*, 2017, **108**, 703-711.
16. F.-A. Tobiesen, O. Juliussen and H.-F. Svendsen, *Chem. Eng. Sci.*, 2008, **68**, 2641-2656.
